# Supplementary material
Source: Springer Nature journal article supplement (https://www.springermedizin.de/resource/supplementary/12888_2013_1675_MOESM4_ESM.pdf/9481158)

↑ F1 punishment

↑ F4 depressive-somatic

↑ BNSQ insomnia

↑ REM %  
↑ SWS latency

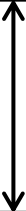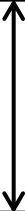

Supplement: MOESM4 [file 9481158]
